# Supplementary material for: Size-controlled synthesis of mesoporous Nb2O5 microspheres for dye sensitized solar cells
Source: Royal Society of Chemistry journal article supplement (doi:10.1039/c4ra06101b), 2014-01-01
Supplement: c4ra06101b1.pdf [file c4ra06101b1.pdf]

## Size-controlled synthesis of mesoporous Nb<sub>2</sub>O<sub>5</sub> microspheres for efficient dye sensitized solar cells

Xiujuan Jin, Chenliang Liu, Jing Xu, Qiufan Wang and Di Chen\*

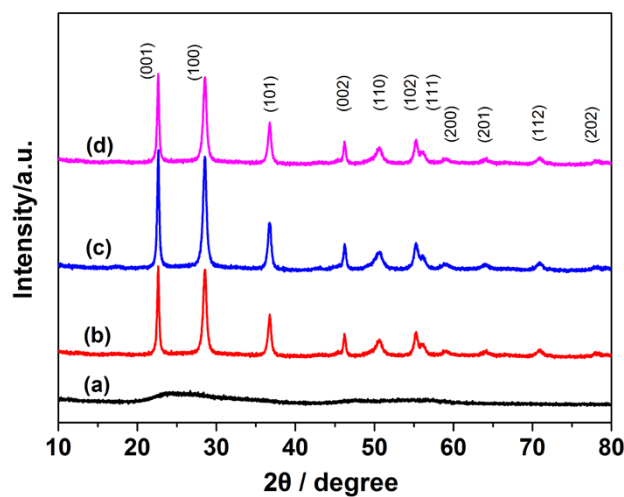

**Figure 1.** XRD patterns of the precursor material (sample S1, a) and the calcined mesoporous Nb<sub>2</sub>O<sub>5</sub> microspheres (b, c, d for sample S1, S2, and S3, respectively)
